# Supplementary material for: Engagement in Culturally and Regionally Relevant Physical Activity (Hula, Outrigger Paddling, Spearfishing and Surfing) in the State of Hawai‘i over the Lifecourse: A cross-sectional analysis
Source: Research Square preprint supplement (doi:10.21203/rs.3.rs-8225534/v1), 2025-12-04
Supplement: Supplementary file 1 [file 9c0345d9811caf120f6820bc.docx]

**Supplemental Tables**

STable 1: Native Hawaiians only. Contexts of engagement across the four culturally and regionally relevant physical activities, among Native Hawaiians reporting engagement in those activities. Respondents could select more than one context of engagement.

|  | **Hula** | **Paddling** | **Spearfishing** | **Surfing** |
| --- | --- | --- | --- | --- |
| **Context** | N,% | N,% | N,% | N,% |
| **Alone** | NA | NA | 31 (15.12%) | 56 (24.56%) |
| **At School** | 125 (45.45%) | 59 (28.10%) | NA | NA |
| **With Family** | 118 (42.91%) | 79 (37.62%) | 152 (74.15%) | 158 (69.30%) |
| **With Friends** | 79 (28.73%) | 94 (44.76%) | 124 (60.49%) | 170 (74.56%) |
| **In hālau hula*; a Club** | 157 (57.09%) | 101 (48.10%) | 3 (1.46%) | 10 (4.39%) |
| **Church** | 33 (12.00%) | 5 (2.38%) | 1 (0.49%) | 4 (1.75%) |
| **Other** | 16 (5.82%) | 7 (3.33%) | 5 (2.44%) | 4 (1.75%) |

*Hula only

STable 2: Among Native Hawaiians only, the frequency of engagement, in a typical month, in each of the culturally and regionally relevant physical activities among those who reported lifetime engagement in one or more of them

|  | **Hula** | **Paddling** | **Spearfishing** | **Surfing** |
| --- | --- | --- | --- | --- |
| **Less than once a month** | 23 (8.49%) | 22 (10.63%) | 40 (20.00%) | 26 (11.40%) |
| **About once a month** | 24 (8.86%) | 30 (14.49%) | 38 (19.00%) | 29 (12.72%) |
| **A few times a month** | 89 (32.84%) | 63 (30.43%) | 72 (36.00%) | 90 (39.47%) |
| **A few times a week** | 105 (38.75%) | 56 (27.05%) | 37 (18.50%) | 58 (25.44%) |
| **Daily or almost daily** | 30 (11.07%) | 36 (17.39%) | 13 (6.50%) | 25 (10.96%) |
